# Supplementary material
Source: Research Square preprint supplement (doi:10.21203/rs.3.rs-8854437/v1)
Supplement: Supplementary file 1 [file 1e20ee67a721e3adb3be5787.docx]

**Mirror test recording:** edited recording of the mirror test protocol.

**Novel object test recording:** edited recording of the novel object test protocol

**Novel object 1 figure:** Pictureof an highlighter. One of the three objects used in the novel object tests.

**Novel object 2 figure:** Picture of an orange peg. One of the three objects used in the novel object tests.

**Novel object 3 figure:** Picture of a small toy. One of the three objects used in the novel object tests.

**Social learning test observation recording:** Edited recording of the observation step of the social learning test. Shows a demonstrator visiting all the wells that contain food.

**Social learning test performing recording:** Edited recording of the performing step of the social learning test. Shows an observer visiting all the wells that contain food.
